# Supplementary material for: Application of [18F]FLT‐PET in pulmonary arterial hypertension: a clinical study in pulmonary arterial hypertension patients and unaffected bone morphogenetic protein receptor type 2 mutation carriers
Source: PubMed Central journal article supplement (PMC8256252; doi:10.1177/20458940211028017), 2021-06-01
Supplement: PUL2-11-20458940211028017-s001.pdf [file PUL2-11-20458940211028017-s001.pdf]

## Supplemental Figure 1

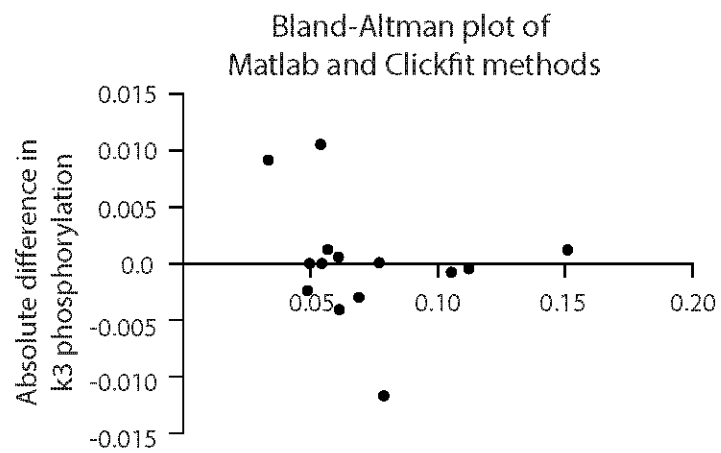

Supplemental Figure 1: Bland-Altman plot comparing two different methods to calculate FLT-uptake in the lung. In PAH patients from the preliminary cohort, kinetic modelling using CLICKFIT gave similar results as the MATLAB 5.3 software.
