# Supplementary material for: Application of [18F]FLT‐PET in pulmonary arterial hypertension: a clinical study in pulmonary arterial hypertension patients and unaffected bone morphogenetic protein receptor type 2 mutation carriers
Source: PubMed Central journal article supplement (PMC8256252; doi:10.1177/20458940211028017), 2021-06-01
Supplement: PUL2-11-20458940211028017-s002.pdf [file PUL2-11-20458940211028017-s002.pdf]

# SUPPLEMENTAL MATERIAL

Supplemental table 1: Comparison between patients in the preliminary study and in the expanded dataset

|                                                                         | Preliminary study<br>n=8 | Expanded cohort<br>n=13 | p-<br>value  |
|-------------------------------------------------------------------------|--------------------------|-------------------------|--------------|
| Age (yr)                                                                | 46 ± 12                  | 44 ± 14                 | 0.732        |
| HPAH, n(%)                                                              | 5 (63%)                  | 9 (69%)                 | 1.000        |
| Male, n(%)                                                              | 4 (50%)                  | 3 (23%)                 | 0.427        |
| NYHA functional class, I/II/III/IV (n)                                  | 2/4/2/0                  | 2/8/3/0                 | 0.834        |
| BMI, kg/m <sup>2</sup>                                                  | 24.6 ± 3.7               | 24.9 ± 3.7              | 0.825        |
| NT-proBNP, ng/ml                                                        | 190 [30-654]             | 229 [70-485]            | 0.943        |
| <b>Medical history</b>                                                  |                          |                         |              |
| Malignancy                                                              | 0                        | 0                       | NA           |
| Hypertension                                                            | 2 (25%)                  | 0                       | 0.259        |
| Diabetes Mellitus                                                       | 1 (13%)                  | 0                       | 0.802        |
| VTE/pulmonary embolism                                                  | 0                        | 1 (8%)                  | 1.000        |
| <b>Treatment</b>                                                        |                          |                         |              |
| Treatment Naïve, n(%)                                                   | 1 (13%)                  | 0                       | 0.802        |
| Monotherapy (ERA or PDE5i), n(%)                                        | 1 (13%)                  | 0                       | 0.802        |
| Dual combination therapy (ERA + PDE5i or PDE5i + prostacyclin* 0), n(%) | 3 (38%)                  | 11 (85%)                | 0.081        |
| Triple combination therapy (ERA + PDE5i + prostacyclin), n(%)           | 3 (38%)                  | 2 (15%)                 | 0.530        |
| <b>Hemodynamic characteristics</b>                                      |                          |                         |              |
| Heart rate, beats/min                                                   | 79 ± 8                   | 73 ± 14                 | 0.236        |
| Mean pulmonary artery pressure, mmHg                                    | 45 [44-55]               | 53 [42-57]              | 0.704        |
| Pulmonary arterial wedge pressure, mmHg                                 | 9 [7-10]                 | 12 [10-13]              | <b>0.017</b> |
| Mean right atrial pressure, mmHg                                        | 6 [3-8]                  | 9 [7-10]                | 0.117        |
| Pulmonary vascular resistance, dyn.s/cm <sup>-5</sup>                   | 318 [222-366]            | 367 [308-511]           | 0.296        |
| Cardiac index, l/min/m <sup>2</sup>                                     | 2.9 ± 0.7                | 2.7 ± 0.7               | 0.470        |
| <b>Cardiac magnetic resonance imaging</b>                               |                          |                         |              |
| RVEDVI, ml/m <sup>2</sup>                                               | 91 [79-101]              | 92 [75-111]             | 0.999        |
| RVESVI, ml/m <sup>2</sup>                                               | 49 [44-63]               | 48 [34-70]              | 0.329        |
| RVEF, %                                                                 | 39 ± 11                  | 47 ± 12                 | 0.104        |
| LVEF, %                                                                 | 63 ± 8                   | 60 ± 16                 | 0.565        |
| <b><sup>18</sup>FLT PET K3 phosphorylation</b>                          |                          |                         |              |
| Mid-region                                                              | 0.081 [0.067-0.107]      | 0.057 [0.053-0.068]     | 0.053        |
| Whole lung                                                              | 0.079 [0.065-0.095]      | 0.076 [0.067-0.083]     | 0.828        |

Data are depicted as mean(SD), median [IQR] or percentages, , BMI: body mass index, VTE: venous thromboembolism, ERA: endothelin receptor antagonist, PDE5i: phosphodiesterase type 5 inhibitor, mRAP: mean right atrial pressure, RVEDVI: Indexed right ventricular end-diastolic volume, RVESVI: Indexed right ventricular end-systolic volume, RVEF: right ventricular ejection fraction, LVEF: left ventricular ejection fraction

Supplemental table 2: follow-up <sup>18</sup>FLT-PET scans in three pulmonary arterial hypertension patient

|           | Baseline characteristics |        |      | <sup>18</sup> FLT-PET 2015 first scan |     |        |        |      |               |                      | <sup>18</sup> FLT-PET 2018 second scan |     |        |        |      |               |                      |                                                                                    |
|-----------|--------------------------|--------|------|---------------------------------------|-----|--------|--------|------|---------------|----------------------|----------------------------------------|-----|--------|--------|------|---------------|----------------------|------------------------------------------------------------------------------------|
|           | Age                      | Gender | BMI  | mPAP                                  | PVR | RVEDVI | RVESVI | RVEF | k3 mid-region | Medication           | mPAP                                   | PVR | RVEDVI | RVESVI | RVEF | k3 mid-region | Change in medication | 12-months follow up                                                                |
| Patient 1 | 54                       | female | 24.5 | 25                                    | 489 | 69     | 43     | 38   | 0.056         | Prostacyclin + PDE5I | 26                                     | 176 | 65     | 27     | 58   | 0.059         | + ERA                | deteriorated mildly                                                                |
| Patient 2 | 68                       | female | 18.3 | 44                                    | 548 | 94     | 55     | 41   | 0.050         | ERA + PDE5I          | 50                                     | 732 | 105    | 68     | 35   | 0.070         | none                 | Severe deterioration and died after stroke                                         |
| Patient 3 | 43                       | male   | 24.4 | 69                                    | 762 | 126    | 105    | 17   | 0.150         | ERA + PDE5I          | 67                                     | 998 | 130    | 100    | 19   | 0.081         | + prostacyclin       | Severe deterioration, received lung transplantation and died after transplantation |

mPAP: mean pulmonary artery pressure, PVR: pulmonary vascular resistance, RVESVI: Indexed right ventricular end-systolic volume; RVEDVI: Indexed right ventricular end-diastolic volume, RVEF: right ventricular ejection fraction, ERA: endothelin receptor antagonist, PDE5I: phosphodiesterase type 5 inhibitor
